# Supplementary material for: The Cash Flow Advantages of 3PLs as Supply Chain Orchestrators
Source: Atypon-hosted journal article supplement (doi:10.1287/msom.2017.0667), 2018-05-25
Supplement: msom.2017.0667.sm1.pdf [file msom.2017.0667.sm1.pdf]

# Online Supplements for “The Cash Flow Advantages of 3PLs as Supply Chain Orchestrators”

Xiangfeng Chen <sup>\*</sup>   Gangshu (George) Cai <sup>†</sup>   Jing-Sheng Song <sup>‡</sup>

## Appendix A: Exogenous Service Rate

This appendix assumes that the service rate ( $w_l$ ) is exogenous. This corresponds to the case in Lemma 2 where the manufacturer decides the optimal solution given the 3PL’s service rate.

As Lemma 2 shows, if all firms’ opportunity costs are the same, neither  $P$  nor  $T$  can strictly outperform the other. Compared with results in Section 3, this observation indicates that fixing the 3PL’s service rate minimizes the 3PL’s capability to facilitate a mutually beneficial outcome for all firms in  $P$ .

With different cash opportunity costs, we find that  $P$  can reemerge as a preferred choice for all firms. From Lemma 2, we have  $q_P^{*'} = \frac{dq_P^*}{d\ell_g} < 0$ . Define  $A(\ell_g) = (\frac{p\bar{F}(q_P^*)}{1+\ell_r a_l} - w_l)q_P^* + [(w_l - c_l)\ell_r + \frac{c_m(1+\ell_o a_m)(\ell_g - \ell_s)}{1+(\ell_o - \ell_g)a_m}]q_P^{*}$ . Comparing firms’ profits between  $T$  and  $P$  yields the following property.

**Corollary 1** *Suppose  $w_l$  is exogenous and the firms have different cash opportunity costs. Let  $\check{\ell} = \frac{(1+\ell_o a_m a_b)(\ell_o - \ell_r)}{a_m(1+\ell_o a_b)}$  and  $\tilde{\ell}$  be the solution to  $\pi_{lT}(q_T^*) = \pi_{lP}(q_P^*, \ell_g)$ .*

1. If  $a_l \geq \frac{(c_l - w_l)q_P^{*'}}{A(\ell_g)}$  and  $\frac{d\pi_{lP}(q_P^*)}{d\ell_g} \geq 0$  then  $\check{\ell} < \tilde{\ell}$ , and  $T \prec P$  for all  $\ell_g \in [\check{\ell}, \tilde{\ell}]$ ;
2. If  $\frac{d\pi_{lP}(q_P^*)}{d\ell_g} < 0$ , then  $T \prec P$  when  $\ell_g \leq \min[\check{\ell}, \tilde{\ell}]$ .

Thus, the qualitative findings with endogenous  $w_l$  and different cash opportunity costs still hold for exogenous  $w_l$ .

## Appendix B

**Proof of Lemma 1:** Taking first derivative of Eq. (3) with respect to (w.r.t.)  $q_{bi}$ , the first-order-condition (FOC) yields

$$q_{bi}^*(w_{li}, w_{mi}) = \begin{cases} \bar{F}^{-1}\left(\frac{w_{mi}(1+\ell_o a) + w_{li}(1+\ell_r a)}{p}\right), & \text{if } i = T, \\ \bar{F}^{-1}\left(\frac{(w_{mi} + w_{li})(1+\ell_r a)}{p}\right), & \text{if } i = P. \end{cases}$$

We have  $q_{bT}^*(w_m, 0) = w_{bP}^*(w_m, 0) = q_b^*(w_m) = \bar{F}^{-1}(w_m/P)$ . If  $w_{li} \neq 0$  and  $a \neq 0$ , we have  $w_{mT}(1 + \ell_o a) + w_{lT}(1 + \ell_r a) > w_m$ , and then  $q_{bT}^*(w_m, w_l) < q_b^*(w_m)$ .

Let  $w_{mT} = w_{mP} = w_m$  and  $w_{lT} = w_{lP} = w_l$ . Since  $\ell_o > \ell_r$ , we have  $w_{mT}(1 + \ell_o a) + w_{lT}(1 + \ell_r a) > (w_{mP} + w_{lP})(1 + \ell_r a)$ , and then obtain  $q_{bP}^*(w_m, w_l) > q_{bT}^*(w_m, w_l)$ . Q.E.D.

---

<sup>\*</sup>School of Management, Fudan University, Email: chenxf@fudan.edu.cn.

<sup>†</sup>Leavey School of Business, Santa Clara University. Email: gcai@scu.edu.

<sup>‡</sup>The Fuqua School of Business, Duke University. Email: jssong@duke.edu

**Proof of Lemma 2:** We first prove that  $\pi_{mi}(w_{mi})$  is unimodal w.r.t.  $w_{mi} \geq 0$ . The first derivative of  $\pi_{mi}(w_{mi})$  w.r.t.  $w_{mi}$  is  $\frac{d\pi_{mi}(w_{mi})}{dw_{mi}} = \frac{\partial \pi_{mi}}{\partial q_{bi}^*} \frac{dq_{bi}^*}{dw_{mi}} + \frac{\partial \pi_{mi}}{\partial w_{mi}}$ , and we have,

$$\frac{d\pi_{mi}(w_{mi})}{dw_{mi}} = \begin{cases} \frac{1+\ell_o a}{ph(q_{bi}^*)} \left[ pH(q_{bi}^*) + \frac{c_m(1+\ell_o a)}{F(q_{bi}^*)} - \frac{w_{mi}(1+\ell_o a)}{F(q_{bi}^*)} \right] & \text{if } i = T, \\ \frac{1+(\ell_o - \ell_g)a}{ph(q_{bi}^*)} \left[ pH(q_{bi}^*) + \frac{(1+\ell_o a)(1+\ell_r a)}{1+(\ell_o - \ell_g)a} \frac{c_m}{F(q_{bi}^*)} - \frac{w_{mi}(1+\ell_r a)}{F(q_{bi}^*)} \right] & \text{if } i = P. \end{cases}$$

It is straightforward that  $pH(q_{bi}^*)$  and  $\frac{1}{F(q_{bi}^*)}$  decrease with  $w_{mi}$  since  $\frac{dq_{bi}^*}{dw_{mi}} < 0$ . And  $\frac{w_{mi}}{F(q_{bi}^*)}$  increases with  $w_{mi}$  since  $\left[ \frac{w_{mi}}{F(q_{bi}^*)} \right]' = \frac{\bar{F}(q_{bi}^*) - w_{mi}(1+\ell_r a)}{F^2(q_{bi}^*)} > 0$ . Hence,  $\frac{d\pi_{mi}(w_{mi})}{dw_{mi}}$  decreases with  $w_{mi}$ . Then, if  $w_{mi} = 0$ , we have  $\frac{d\pi_{mi}(w_{mi})}{dw_{mi}} > 0$ ; if  $w_{mi} \rightarrow \infty$ ,  $\frac{d\pi_{mi}(w_{mi})}{dw_{mi}} < 0$ . Therefore,  $\pi_{mi}(w_{mi})$  is unimodal w.r.t.  $w_{mi}$ . Solving the first order condition  $\frac{d\pi_{mi}(w_{mi})}{dw_{mi}} = 0$  results in

$$w_{mi}^*(w_l) = \begin{cases} c_m + \frac{pq_{bT}^*(w_{lT}, w_{mT}^*)f(q_{bT}^*(w_{lT}, w_{mT}^*))}{1+\ell_o a}, & \text{if } i = T, \\ \eta_m c_m + \frac{pq_{bP}^*(w_{lP}, w_{mP}^*)f(q_{bP}^*(w_{lP}, w_{mP}^*))}{1+\ell_r a}, & \text{if } i = P, \end{cases}$$

where  $\eta_m = \frac{1+\ell_o a}{1+(\ell_o - \ell_g)a}$ . Given  $\ell_g \geq 0$ , we get  $\eta_m \geq 1$ .

For a fixed  $w_l = w_{lT} = w_{lP}$ , from Lemma 1, we have,  $p\bar{F}(q_{bT}^*) = w_{mT}(1 + \ell_o a) + w_l(1 + \ell_r a)$  and  $p\bar{F}(q_{bP}^*) = (w_{mP} + w_l)(1 + \ell_r a)$ . Submitting  $w_{mi}^*$  into these two equations, we can obtain the optimal order quantities  $q_{bi}(w_{mi}^*, w_l)$  solving the following equations

$$\begin{aligned} p\bar{F}(q_{bT}^*) - pq_{bT}^* f(q_{bT}^*) - w_l(1 + \ell_r a) &= c_m(1 + \ell_o a), \\ p\bar{F}(q_{bP}^*) - pq_{bP}^* f(q_{bP}^*) - w_l(1 + \ell_r a) &= c_m \frac{1 + \ell_o a}{\eta_l}. \end{aligned}$$

Note that  $qf(q) = H(q)\bar{F}(q)$  increases with  $q$ , since  $[H(q)\bar{F}(q)]' = \bar{F}(q)[h(q)[1 - H(q)] + qh'(q)] > 0$ . Then, we have  $p\bar{F}(q) - pqf(q)$  decreases in  $q$ . Let  $\ell_g = \ell_s$ , we have  $q_{bT}^*(w_{mT}^*, w_l) = q_{bP}^*(w_{mP}^*, w_l)$ , since  $\eta_l = 1$ . Since  $\eta_m > 1$  and  $\ell_o > \ell_r$ , we have  $w_{mP}^* \geq w_{mT}^*$ . If  $\ell_g < \ell_s$ , we have  $\eta_l > 1$  and  $q_{bT}^*(w_{mT}^*, w_l) < q_{bP}^*(w_{mP}^*, w_l)$ ; otherwise,  $q_{bT}^*(w_{mT}^*, w_l) \geq q_{bP}^*(w_{mP}^*, w_l)$ . Q.E.D.

**Proof of Lemma 3:** From Eq. (10),

$$\frac{d\pi_{li}(q_{bi}^*(w_{li}))}{dq_{bi}^*(w_{li})} = \begin{cases} p\bar{F}(q_{bT}^*)[(1 - H(q_{bT}^*))^2 - q_{bT}^*H'(q_{bT}^*)] - c_m(1 + \ell_o a) - c_l(1 + \ell_r a), \\ p\bar{F}(q_{bP}^*)[(1 - H(q_{bP}^*))(1 - \eta_l H(q_{bP}^*)) - \eta_l q_{bP}^*H'(q_{bP}^*)] - c_m(1 + \ell_o a) - c_l(1 + \ell_r a). \end{cases}$$

Define  $G(p, q_{li}, 1) = p\bar{F}(q_{li})[(1 - H(q_{li}))^2 - q_{li}H'(q_{li})] > 0$ . Since  $H(q_{li})$  and  $q_{li}H'(q_{li})$  increase with  $q_{li}$ , and  $\bar{F}(q_{li})$  decreases with  $q_{li}$ ,  $G(p, q_{li}, 1)$  decreases with  $q_{li}$ . Similarly, define  $G(p, q_{li}, \eta) \equiv p\bar{F}(q_{li})[(1 - H(q_{li}))(1 - \eta_l H(q_{li})) - \eta_l q_{li}H'(q_{li})]$ , which decreases with  $q_{li}$ . In addition, we have  $\frac{d\pi_{li}(q_{li})}{dq_{li}}|_{q_{li}=0} = p - c_m(1 + \ell_o a) - c_l(1 + \ell_r a) > 0$ , and  $\frac{d\pi_{li}(q_{li})}{dq_{li}}|_{q_{li} \rightarrow \infty} = -c_m(1 + \ell_o a) - c_l(1 + \ell_r a) < 0$ . Thus,  $\pi_{li}(q_{li})$  is unimodal in  $q_{li} \geq 0$ . Solving the FOC leads to the result in Lemma 3. Q.E.D.

**Proof of Proposition 1: Part (i):** From Lemma 3, we get  $G(p, q_{lP}^*, \eta) = G(p, q_{lT}^*, 1) \leq G(p, q_{lT}^*, \eta)$  since  $\ell_g \geq \ell_s$  and  $\eta_l \leq 1$ . Since  $G(p, q, \eta)$  decreases in  $q$ , we obtain  $q_{lT}^* \leq q_{lP}^*$ .

**Part (ii):** Based on the proof of Part (iv), we have  $w_{lT}^*(1 + \ell_r a) = p\bar{F}(q_{lT}^*)[1 - H(q_{lT}^*)] - c_m(1 + \ell_o a)$  and  $w_{lP}^*(1 + \ell_r a) = p\bar{F}(q_{lP}^*)[1 - H(q_{lP}^*)] - c_m \frac{1+\ell_o a}{\eta_l}$ . Since  $\bar{F}(q)[1 - H(q)]$  decreases with  $q$  and  $q_{lT}^* \leq q_{lP}^*$ , we have  $p\bar{F}(q_{lP}^*)[1 - H(q_{lP}^*)] \leq p\bar{F}(q_{lT}^*)[1 - H(q_{lT}^*)]$ . And since  $\ell_g \geq \ell_s$ , we have  $\frac{c_m(1+\ell_o a)}{\eta_l} \geq c_m(1 + \ell_o a)$ . Thus, we obtain  $w_{lP}^* \leq w_{lT}^*$ .

**Part (iii):** According to Lemma 3,  $q_{lP}^*$  (i.e.,  $q_P^*$ ) solves the following equation.

$$G(p, q_P^*, \eta) = c_m(1 + \ell_o a) + c_l(1 + \ell_r a).$$

It is easy to see that the left hand side (LHS) of the above equation increases with  $\ell_g$ , but decreases with  $q$ . Since the value of LHS decreases with  $q$ , we should increase  $q$  to make the equation satisfied when  $\ell_g$  increases. Thus, given that the right hand side is fixed, we have  $q_{lP}^*$  increases with  $\ell_g$ .

We can rewrite the buyer's profit as  $\pi_{bP}^* = p\mathbb{E}[D \wedge q_{lP}^*] - q\bar{F}(q_{lP}^*)$ . Taking first order and second order derivatives with respect to  $q_{lP}^*$ , we have  $\frac{d\pi_{bP}(q_{lP}^*)}{dq_{lP}^*} = p\bar{F}(q_{lP}^*)H(q_{lP}^*) > 0$  and  $\frac{d^2\pi_{bP}(q_{lP}^*)}{dq_{lP}^{*2}} =$

$p\bar{F}(q_{iP}^*)[h(q_{iP}^*)(1 - H(q_{iP}^*)) + q_{iP}^*h'(q_{iP}^*)] > 0$ . Therefore,  $\pi_{bP}(q_{iP}^*)$  convexly increases with  $q_{iP}^*$ . Since  $q_{iP}^*$  increases with  $\ell_g$ ,  $\pi_{bP}(q_{iP}^*)$  convexly increases with  $\ell_g$ .

The profit of 3PL is:  $\pi_{iP}(q_{iP}^*) = [p\bar{F}(q_{iP}^*)(1 - \eta_l H(q_{iP}^*)) - c_m(1 + \ell_o) - c_l(1 + \ell_r a)] q_{iP}^*$ . We then have  $\frac{d\pi_{iP}(q_{iP}^*)}{d\ell_g} = \frac{p a}{1 + \ell_r a} q_{iP}^* \bar{F}(q_{iP}^*) H(q_{iP}^*) > 0$  and  $\frac{d^2 \pi_{iP}(q_{iP}^*)}{d\ell_g^2} = \frac{p a}{1 + \ell_r a} \bar{F}(q_{iP}^*) [H(q_{iP}^*)(1 - H(q_{iP}^*)) + q_{iP}^* H'(q_{iP}^*)] \frac{dq_{iP}^*}{d\ell_g} > 0$ . Thus we can show that  $\pi_{iP}(q_{iP}^*)$  convexly increases with  $\ell_g$ .

**Part (iv):** Given  $q_{ii}^*$ , we have

$$w_{mi}^* = \begin{cases} \frac{pq_{iT}^* f(q_{iT}^*) + c_m(1 + \ell_o a)}{1 + \ell_o a}, & \text{if } i = T, \\ \frac{pq_{iP}^* f(q_{iP}^*) + c_m(1 + \ell_o a)/\eta_l}{1 + \ell_r a}, & \text{if } i = P, \end{cases}$$

and

$$w_{ii}^*(1 + \ell_r a) = \begin{cases} p\bar{F}(q_{iT}^*)[1 - H(q_{iT}^*)] - c_m(1 + \ell_o a), & \text{if } i = T, \\ p\bar{F}(q_{iP}^*)[1 - H(q_{iP}^*)] - c_m(1 + \ell_o a)/\eta_l, & \text{if } i = P. \end{cases}$$

Submitting  $w_{ii}^*(q_{ii}^*)$  and  $w_{mi}^*(q_{ii}^*)$  into Eq. (3), we have

$$\pi_{bi}(q_{ii}^*) = \begin{cases} p \mathbb{E}[D \wedge q_{iT}^*] - q_{iT}^* \bar{F}(q_{iT}^*), & \text{if } i = T, \\ p \mathbb{E}[D \wedge q_{iP}^*] - q_{iP}^* \bar{F}(q_{iP}^*), & \text{if } i = P. \end{cases}$$

Since  $\frac{d\pi_{bi}(q_{ii}^*)}{dq_{ii}^*} = q_{ii}^* f(q_{ii}^*) \geq 0$ , we have  $\pi_{bT}(q_{iT}^*) \leq \pi_{bP}(q_{iP}^*)$  because  $q_{iT}^* \leq q_{iP}^*$  conditional on  $\ell_g \geq \ell_s$  according to Proposition 1. Similarly, we have  $\pi_{iT}(q_{iT}^*) \leq \pi_{iP}(q_{iP}^*)$ .

Since the buyer and the 3PL's profits in  $P$  increase with  $\ell_g$  but those in  $T$  are independent of  $\ell_g$ , the buyer and the 3PL firm's preference of  $P$  to  $T$  grows stronger as  $\ell_g$  increases. Q.E.D.

**Proof of Proposition 2 Part (i):** Note that  $\pi_{mP}(q_{iP}^*, \ell_g) = p\eta_l q_{iP}^* \bar{F}(q_{iP}^*) H(q_{iP}^*) - \frac{d\pi_{mP}(q_{iP}^*, \ell_g)}{d\ell_g} = p\eta_l \bar{F}(q_{iP}^*) [H(q_{iP}^*)(1 - H(q_{iP}^*)) + q_{iP}^* H'(q_{iP}^*)] \frac{dq_{iP}^*}{d\ell_g} - p \frac{a}{1 + \ell_r a} q_{iP}^* \bar{F}(q_{iP}^*) H(q_{iP}^*)$ . And

$$\frac{dq_{iP}^*}{d\ell_g} = \frac{a}{1 + \ell_r a} \frac{H(q_{iP}^*) - H^2(q_{iP}^*) + q_{iP}^* H'(q_{iP}^*)}{\frac{h(q_{iP}^*)(c'_m + c'_l)}{p\bar{F}(q_{iP}^*)} + H'(q_{iP}^*) + \eta_l [2H'(q_{iP}^*)(1 - H(q_{iP}^*)) + q_{iP}^* H''(q_{iP}^*)]} \geq 0.$$

According to Lemma 3,  $q_{iP}^*$  solves the following equation  $p\bar{F}(q_{iP}^*)[(1 - H(q_{iP}^*))(1 - \eta_l H(q_{iP}^*)) - \eta_l q_{iP}^* H'(q_{iP}^*)] = c'_m + c'_l$ , where  $c'_m = c_m(1 + \ell_o a)$  and  $c'_l = c_l(1 + \ell_r a)$ .

Furthermore, we have,  $p\eta_l \bar{F}(q_{iP}^*) [H(q_{iP}^*)(1 - H(q_{iP}^*)) + q_{iP}^* H'(q_{iP}^*)] = p\bar{F}(q_{iP}^*)(1 - H(q_{iP}^*)) - c'_m - c'_l$ . Then, we have,

$$\frac{d\pi_{mP}(q_{iP}^*, \ell_g)}{d\ell_g} = [p\bar{F}(q_{iP}^*)(1 - H(q_{iP}^*)) - c'_m - c'_l] \left[ -\frac{p a}{1 + \ell_r a} \frac{p\bar{F}(q_{iP}^*) q_{iP}^* H(q_{iP}^*)}{p\bar{F}(q_{iP}^*)(1 - H(q_{iP}^*)) - c'_m - c'_l} + \frac{dq_{iP}^*}{d\ell_g} \right].$$

Define  $M1(\ell_g) = \frac{p\bar{F}(q_{iP}^*) q_{iP}^* H(q_{iP}^*)}{p\bar{F}(q_{iP}^*)(1 - H(q_{iP}^*)) - c'_m - c'_l}$ . As  $\ell_g$  increases,  $q(\ell_g)$  increases,  $p\bar{F}(q_{iP}^*) q_{iP}^* H(q_{iP}^*)$  increases, but  $p\bar{F}(q_{iP}^*)(1 - H(q_{iP}^*)) - c'_m - c'_l$  decreases. Thus,  $M1(\ell_g)$  increases with  $\ell_g$ .

Let  $M2(\ell_g) = \frac{dq_{iP}^*}{d\ell_g}$ .

**Case I:**  $\frac{dM2(\ell_g)}{d\ell_g} \geq 0$

Therefore, both  $M1(\ell_g)$  and  $M2(\ell_g)$  are monotonic increasing with  $\ell_g$ .

If we can show that  $M2(\ell_g) - M1(\ell_g) > 0$  when  $\ell_g$  is a very small quantity making  $q_{bP} \rightarrow 0$ .  $M2(\ell_g) - M1(\ell_g) < 0$  when  $\ell_g$  is a very large value making  $q_{iP}^* \rightarrow \check{q}$ , which solves  $p\bar{F}(1 - H(q)) = c'_m + c'_l$ . Let  $q_{iP}^*(\ell_g) \rightarrow 0$ , we have,  $\frac{d\pi_{mP}(q_{iP}^*, \ell_g)}{d\ell_g} \Big|_{q_{iP}^*(\ell_g)=0} = \frac{a}{[1 + (\ell_o - \ell_g)a] p\bar{F}(q_{iP}^*)} \frac{[p\bar{F}(q_{iP}^*) - c'_m - c'_l]^2}{\frac{h(q_{iP}^*)(c'_m + c'_l)}{p\bar{F}(q_{iP}^*)}} > 0$ .

Let  $q_{iP}^*(\ell_g) \rightarrow \check{q}$ , we have,  $\frac{d\pi_{mP}(q_{iP}^*, \ell_g)}{d\ell_g} \Big|_{q_{iP}^*(\ell_g)=\check{q}} = -p \frac{a}{1 + \ell_r a} q_{iP}^* \bar{F}(q_{iP}^*) H(q_{iP}^*) < 0$ . Let  $\check{q}$  solves  $p\bar{F}(q_{iP}^*)(1 - H(q_{iP}^*)) - c'_m - c'_l = 0$ , we get  $\frac{\pi_{mP}(q_{iP}^*, \ell_g)}{d\ell_g} \Big|_{q_{iP}^*(\ell_g) \rightarrow \check{q}} < 0$ . Thus,  $\pi_{mP}(q_{iP}^*(\ell_g))$  is a unimodal function  $\ell_g$ , and  $q_{iP}^*(\ell_g)$  satisfying  $\frac{d\pi_{mP}(q_{iP}^*(\ell_g))}{d\ell_g} = 0$ .

**Case II:**  $\frac{dM2(\ell_g)}{d\ell_g} < 0$

$\frac{d\pi_{mP}(q_{iP}^*, \ell_g)}{d\ell_g} = [p\bar{F}(q_{iP}^*)(1 - H(q_{iP}^*)) - c'_m - c'_l] [-M1(\ell_g) + M2(\ell_g)]$ . According to Case I, we show

that  $M1(\ell_g)$  increases with  $\ell_g$ , and  $-M1(\ell_g) + M2(\ell_g)$  decreases with  $\ell_g$ . Thus,  $\frac{d\pi_{mP}(q_{lP}^*, \ell_g)}{d\ell_g}$  decreases in  $\ell_g$ . As shown in Case I,  $\frac{d\pi_{mP}(q_{lP}^*, \ell_g)}{d\ell_g}|_{q_{lP}^*(\ell_g)=0} > 0$  and  $\frac{d\pi_{mP}(q_{lP}^*, \ell_g)}{d\ell_g}|_{q_{lP}^*(\ell_g)=\bar{q}} < 0$ . Therefore,  $\pi_{mP}(q_{lP}^*, \ell_g)$  is a unimodal function in  $\ell_g$ .

**Part (ii):** Part (ii) is a direct result of Part (i). Since  $\pi_{mP}(q_{lP}^*(\ell_g))$  is a unimodal function in  $\ell_g$ , there must exist a unique  $\bar{\ell} > \ell_o - \ell_r$  such that  $\pi_{mP}(q_{lP}^*(\ell_g)) = \pi_{mT}(q_{lT}^*(\ell_g))$  and  $\pi_{mP}(q_{lP}^*(\ell_g)) < \pi_{mT}(q_{lT}^*(\ell_g))$  if  $\ell_g > \bar{\ell}$ . Q.E.D.

**Proof of Corollary 1: Part (i):** We have  $G(p, q_{lP}^*, \eta) = c_m(1 + \ell_o a) + c_l(1 + \ell_r a) = p\bar{F}(q^C(a)) > G(p, q^C(a), \eta)$  since  $\eta \leq 1$  and  $\ell_g \geq \ell_s$ . Since  $G(p, q, \eta)$  decreases with  $q$ , we have  $q_{lP}^* < q^C(a)$ .

**Part (ii):** We have  $\pi_T^{SC}(q_{lT}^*) \leq \pi_P^{SC}(q_{lP}^*) < \pi_T^{SC}(q^C(a)) = \pi_P^{SC}(q^C(a))$  because of  $q_{lT}^* \leq q_{lP}^* < q^C(a)$ . Similarly, we can show that  $q_{lT}^* > q_{lP}^*$  and  $\pi_T^{SC}(q_{lT}^*) > \pi_P^{SC}(q_{lP}^*)$  when  $\ell_g < \ell_s$ . Q.E.D.

**Proof of Proposition 3:** We now prove that, when the manufacturer is the Stackelberg leader,  $\pi_{mP}(q_{mP}^*) = \pi_{mT}(q_{mT}^*)$ ,  $\pi_{lP}(q_{mP}^*) = \pi_{lT}(q_{mT}^*)$ , and  $\pi_{bP}(q_{mP}^*) = \pi_{bT}(q_{mT}^*)$ . We solve the game backward. Given the manufacturer and the 3PL's decisions, the buyer problem is the same as in Lemma 1 where the 3PL is the Stackelberg leadership. From Lemma 1, we have  $w_{lT} = \frac{p\bar{F}(q_{bT}^*) - w_{mT}(1 + \ell_o a)}{1 + \ell_r a}$ , and  $w_{lP} = \frac{p\bar{F}(q_{bP}^*) - w_{mP}(1 + \ell_r a)}{1 + \ell_r a}$ . Submitting  $w_{li}(q_{bi}^*)$  into Eq. (5), rewriting the 3PL firm's problem, and taking the first order derivative w.r.t.  $q_{li}$ , we have,

$$\frac{d\pi_{li}(q_{li})}{dq_{li}} = \begin{cases} p\bar{F}(q_{lT})[1 - H(q_{lT})] - w_{mT}(1 + \ell_o a) - c_l(1 + \ell_r a), & \text{if } i = T, \\ p\bar{F}(q_{lP})[1 - H(q_{lP})] - w_{mP}(1 + (\ell_o - \ell_g)a) - c_l(1 + \ell_r a), & \text{if } i = P. \end{cases}$$

Denoting  $q_{li}^*$  that solves  $\frac{d\pi_{li}(q_{li})}{dq_{li}} = 0$ , we then obtain

$$w_{mi}(q_{li}^*) = \begin{cases} \frac{p\bar{F}(q_{lT}^*)[1 - H(q_{lT}^*)] - c_l(1 + \ell_r a)}{1 + \ell_o a}, & \text{if } i = T, \\ \frac{p\bar{F}(q_{lP}^*)[1 - H(q_{lP}^*)] - c_l(1 + \ell_r a)}{1 + (\ell_o - \ell_g)a}, & \text{if } i = P. \end{cases}$$

Submitting  $w_{mi}(q_{li}^*)$  into Eq. (4), we can rewrite the manufacturer's profit function as below:

$$\pi_{mi}(w_{mi}(q_{li}^*)) = \pi_{mP}(q_{mi}) = \begin{cases} (p\bar{F}(q_{mT})[1 - H(q_{mT})] - c_l(1 + \ell_r a) - c_m(1 + \ell_o a))q_{mT}, & \text{if } i = T, \\ (p\bar{F}(q_{mP})[1 - H(q_{mP})] - c_l(1 + \ell_r a) - c_m(1 + \ell_o a))q_{mP}, & \text{if } i = P. \end{cases}$$

Therefore, we have  $q_{mT}^* = q_{mP}^*$ , which solves  $\frac{d\pi_{mP}(q_{mP})}{dq_{mP}} = 0$ . As a result,  $\pi_{mP}(q_{mP}^*) = \pi_{mT}(q_{mT}^*)$ . The buyer's profit is:  $\pi_{bi}(q_{mi}^*) = p\mathbb{E}[D \wedge q_{mi}^*] - p q_{mi}^* \bar{F}(q_{mi}^*)$ . Since  $q_{mT}^* = q_{mP}^*$ , we have  $\pi_{bT}(q_{mT}^*) = \pi_{bP}(q_{mP}^*)$ . Similarly, we can show that  $\pi_{lT}(q_{mT}^*) = \pi_{lP}(q_{mP}^*)$ . Q.E.D.

**Proof of Proposition 4:** The buyer, the manufacturer, and the 3PL's profit functions under Case T and Case B can be written as follows.

$$\pi_{bi}(q_{bi}) = \begin{cases} p\mathbb{E}[D \wedge q_{bi}] - [w_{mi}(1 + \ell_o a_b) + w_{li}(1 + \ell_r a_b)]q_{bi}, & \text{if } i = T, \\ p\mathbb{E}[D \wedge q_{bi}] - w_{mi}(1 + (\ell_o - \ell_g)a_b)q_{bi} - w_{li}q_{bi}(1 + \ell_r a_b), & \text{if } i = B, \end{cases} \quad (1)$$

$$\pi_{mi}(w_{mi}) = \begin{cases} (w_{mi} - c_m)(1 + \ell_o a_m)q_{bi}, & \text{if } i = T, \\ [w_{mi}(1 + (\ell_o - \ell_g)a_m) - c_m(1 + \ell_o a_m)]q_{bi}, & \text{if } i = B. \end{cases} \quad (2)$$

$$\pi_{li}(w_{li}) = \begin{cases} (w_{li} - c_l)(1 + \ell_r a_l)q_{bi}, & \text{if } i = T, \\ (w_{li} - c_l)(1 + \ell_r a_l)q_{bi}, & \text{if } i = B. \end{cases} \quad (3)$$

**Case one: the 3PL leadership.** We solve the game backward. First, we solve the optimal ordering level  $q_{bT}^*$  and  $q_{bB}^*$ , and get  $w_{mT}(q_{bT}^*, w_{lT})$  and  $w_{mB}(q_{bB}^*, w_{lB})$ ; Next, submitting  $w_{mT}(q_{bT}^*, w_{lT})$  and  $w_{mB}(q_{bB}^*, w_{lB})$  into manufacturer's profit function, we change  $\pi_{mT}(w_{mT})$  and  $\pi_{mB}(w_{mB})$  into  $\pi_{mT}(q_{mT}, w_{lT})$  and  $\pi_{mB}(q_{mB}, w_{lB})$ , solve the optimal problems of  $q_{mT}^*$  and  $q_{mB}^*$  instead of  $w_{mT}^*$  and  $w_{mB}^*$ , and obtain  $w_{lT}(q_{mT}^*)$  and  $w_{lB}(q_{mB}^*)$ ; Finally, submitting  $w_{lT}(q_{mT}^*)$  and  $w_{lB}(q_{mB}^*)$  into 3PL's profit functions, we change the optimal problems of  $\pi_{lT}(w_{lT})$  and  $\pi_{lB}(w_{lB})$  into  $\pi_{lT}(q_{lT})$  and  $\pi_{lB}(q_{lB})$ , and obtain  $q_{lT}^*$  (i.e.,  $q_T^*$ ) and  $q_{lB}^*$  (i.e.,  $q_B^*$ ) solving the following equations, respectively.

$$\begin{cases} G(p, q_T^*, 1) - c_l(1 + \ell_r a_b) - c_m(1 + \ell_o a_b) = 0, \\ G(p, q_B^*, 1) - c_l(1 + \ell_r a_b) - c_m(1 + \ell_o a_b) \frac{1 + (\ell_o - \ell_g)a_b}{1 + (\ell_o - \ell_g)a_m} \frac{1 + \ell_o a_m}{1 + \ell_o a_b} = 0. \end{cases}$$

As a result, the firms' profits can be written as:

$$\begin{cases} \pi_{bT}(q_T^*) = p\mathbb{E}[D \wedge q_T^*] - p\bar{F}(q_T^*)q_T^*, \\ \pi_{bB}(q_B^*) = p\mathbb{E}[D \wedge q_B^*] - p\bar{F}(q_B^*)q_B^*. \end{cases}$$

$$\begin{cases} \pi_{mT}(q_T^*) = p \frac{1+\ell_o a_m}{1+\ell_o a_b} q_T^* \bar{F}(q_T^*) H(q_T^*), \\ \pi_{mB}(q_B^*) = p \frac{1+(\ell_o - \ell_g) a_m}{1+(\ell_o - \ell_g) a_b} q_B^* \bar{F}(q_B^*) H(q_B^*). \end{cases}$$

$$\begin{cases} \pi_{lT}(q_T^*) = p q_T^* \frac{1+\ell_r a_l}{1+\ell_r a_b} \bar{F}(q_T^*) [1 - H(q_T^*)] - \frac{(1+\ell_o a_b)(1+\ell_r a_l)}{1+\ell_r a_b} c_m q_T^* - (1 + \ell_r a_l) c_l q_T^*, \\ \pi_{lB}(q_B^*) = p q_B^* \frac{1+\ell_r a_l}{1+\ell_r a_b} \bar{F}(q_B^*) [1 - H(q_B^*)] - \frac{(1+\ell_o a_m)(1+\ell_r a_l)(1+(\ell_o - \ell_g) a_b)}{(1+\ell_r a_b)(1+(\ell_o - \ell_g) a_m)} c_m q_B^* - (1 + \ell_r a_l) c_l q_B^*. \end{cases}$$

With the same cash opportunity cost, we have  $q_T^* = q_B^*$ , and then obtain that  $\pi_{lT}(q_T^*) = \pi_{lB}(q_B^*)$ ,  $\pi_{mT}(q_T^*) = \pi_{mB}(q_B^*)$ , and  $\pi_{lT}(q_T^*) = \pi_{lB}(q_B^*)$ .

**Case two: the manufacturer leadership.** The profit functions of players are the same as those in Case one. Similar to Case one, we have  $q_T^* = q_B^*$  if the cash opportunity cost is equal, and get  $\pi_{lT}(q_T^*) = \pi_{lB}(q_B^*)$ ,  $\pi_{mT}(q_T^*) = \pi_{mB}(q_B^*)$ . Q.E.D.

**Proof of Lemma 4:** We solve the game in its general form backward. For the buyer, solving  $\frac{d\pi_{bi}(q_{bi})}{dq_{bi}} = 0$  in Eq. (3), we have the buyer's optimal ordering solution  $q_{bi}^*$ . Since  $q_{bi}^*$  monotonically decreases with  $w_{mi}$ , there exists a one-by-one mapping between  $q_{bi}^*$  and  $w_{mi}$ , that is,

$$w_{mi}(q_{bi}^*) = \begin{cases} \frac{p\bar{F}(q_{bi}^*) - w_{li}(1+\ell_r a_b)}{1+\ell_o a_b}, & i = T, \\ \frac{p\bar{F}(q_{bi}^*) - w_{li}(1+\ell_r a_b)}{1+\ell_r a_b}, & i = P. \end{cases}$$

Submitting  $w_{mi}(q_{bi}^*)$  into the manufacturer's profit function, and solving  $\frac{d\pi_{mi}(q_{mi})}{dq_{mi}} = 0$ , we then have

$$w_{li}(q_{mi}^*) = \begin{cases} \frac{p\bar{F}(q_{mi}^*)[1-H(q_{mi}^*)] - c_m(1+\ell_o a_b)}{1+\ell_r a_b}, & i = T, \\ \frac{p\bar{F}(q_{mi}^*)[1-H(q_{mi}^*)] - \frac{c_m(1+\ell_o a_m)}{1+(\ell_o - \ell_g) a_m}}{1+\ell_r a_b}, & i = P. \end{cases}$$

For  $P$ , submitting  $w_{lP}(q_{mi}^*)$  into  $w_{mP}(q_{mi}^*)$ , we have,  $w_{mP}(q_{mP}^*) = \frac{p\bar{F}(q_{mP}^*)H(q_{mP}^*)}{1+\ell_r a_b} + \frac{c_m(1+\ell_o a_m)}{1+(\ell_o - \ell_g) a_m}$ .

Then, submitting  $w_{li}(q_{mi}^*)$  and  $w_{mP}(q_{mi}^*)$  into 3PL's profit function, we have

$$\pi_{li}(q_{li}) = \begin{cases} p q_{li} \frac{1+\ell_r a_l}{1+\ell_r a_b} \bar{F}(q_{li}) [1 - H(q_{li})] - \frac{(1+\ell_o a_b)(1+\ell_r a_l)}{1+\ell_r a_b} c_m q_{li} - c_l(1 + \ell_r a_l) q_{li}, & i = T, \\ p q_{li} \frac{1+\ell_r a_l}{1+\ell_r a_b} \bar{F}(q_{li}) [1 - \frac{1+(\ell_o - \ell_g) a_l}{1+\ell_r a_l} H(q_{li})] - \frac{(1+\ell_o a_m)[1+(\ell_o - \ell_g) a_l]}{1+(\ell_o - \ell_g) a_m} c_m q_{li} - c_l(1 + \ell_r a_l) q_{li}, & i = P. \end{cases}$$

Define  $\eta_m = \frac{1+\ell_o a_m}{1+(\ell_o - \ell_g) a_m}$ ,  $\eta_l = \frac{1+(\ell_o - \ell_g) a_l}{1+\ell_r a_l}$  and  $\eta_b = \frac{1+\ell_r a_b}{1+\ell_o a_b}$ . Taking the first derivative of  $\pi_{li}(q_{li})$  w.r.t.  $q_{li}$ , and letting  $\frac{d\pi_{li}(q_{li})}{dq_{li}} = 0$ , we can solve the 3PL's optimal solution  $q_{lT}^*$  (i.e.,  $q_T^*$ ) and  $q_{lP}^*$  (i.e.,  $q_P^*$ ) by the following equations.

$$\begin{cases} G(p, q_T^*, 1) - c_l(1 + \ell_r a_b) - c_m(1 + \ell_o a_b) = 0, \\ G(p, q_P^*, \eta_l) - c_l(1 + \ell_r a_b) - c_m(1 + \ell_o a_b) \eta_m \eta_l \eta_b = 0. \end{cases} \quad (4)$$

Q.E.D.

**Proof of Proposition 5:** We first show that, if  $a_m \geq a_l$ ,  $\eta_m \eta_l$  increases in  $\ell_g$  and vice versa. We obtain that  $\frac{d\eta_m \eta_l}{d\ell_g} = \frac{1+\ell_o a_m}{(1+\ell_r a_l)[1+(\ell_o - \ell_g) a_m]^2} (a_m - a_l)$ . Therefore, if  $a_m \geq a_l$ , we have  $\frac{d\eta_m \eta_l}{d\ell_g} \geq 0$ , and vice versa.

**Part (i):** *First:*  $\pi_{lP} \geq \pi_{lT}$  iff  $a_b \geq a_m$ . Given  $\ell_g = \ell_o - \ell_r$ ,  $\eta_l = 1$ . In Eq. (4), we observe  $\eta_m \eta_b \leq 1$  when  $a_b \geq a_m$ , which suggests  $q_P^* \geq q_T^*$  because  $p\bar{F}(q)[(1 - H(q))^2 - qH'(q)]$  decreases with  $q$ . Consequently,

$$\begin{cases} \pi_{lT}(q_T^*) = p q_T^* \frac{1+\ell_r a_l}{1+\ell_r a_b} \bar{F}(q_T^*) [1 - H(q_T^*)] - \frac{(1+\ell_o a_b)(1+\ell_r a_l)}{1+\ell_r a_b} c_m q_T^* - (1 + \ell_r a_l) c_l q_T^*, \\ \pi_{lP}(q_P^*) = p q_P^* \frac{1+\ell_r a_l}{1+\ell_r a_b} \bar{F}(q_P^*) [1 - H(q_P^*)] - \frac{(1+\ell_g a_m)(1+\ell_r a_l)}{1+\ell_r a_m} c_m q_P^* - (1 + \ell_r a_l) c_l q_P^*. \end{cases} \quad (5)$$

Since  $a_b \geq a_m$ , we have  $\frac{(1+\ell_r a_l)(1+\ell_o a_b)}{1+\ell_r a_b} \geq \frac{(1+\ell_r a_l)(1+\ell_o a_m)}{1+\ell_r a_m}$ , then we show  $\pi_{lT}(q_T^*) \leq \pi_{lP}(q_P^*)$ .

*Second:*  $\pi_{mP} \geq \pi_{mT}$  if  $a_b \geq a_m$ .

Submitting  $q_{lT}^*$  and  $q_{lP}^*$  into the manufacture's profit, we have,

$$\begin{cases} \pi_{mT}(q_T^*) = p \frac{1+\ell_o a_m}{1+\ell_o a_b} q_T^* \bar{F}(q_T^*) H(q_T^*), \\ \pi_{mP}(q_P^*) = p \frac{1+\ell_r a_m}{1+\ell_r a_b} q_P^* \bar{F}(q_P^*) H(q_P^*). \end{cases} \quad (6)$$

Following our proof in Proposition 1, in which we show that  $\bar{F}(q)H(q)$  increases in  $q$ , we have  $q_T^* \bar{F}(q_T^*) H(q_T^*) \leq q_P^* \bar{F}(q_P^*) H(q_P^*)$  since  $q_T^* \leq q_P^*$ . Because  $a_b \geq a_m$  and  $\ell_o \geq \ell_r$ , we have  $\frac{1+\ell_o a_m}{1+\ell_o a_b} \leq$

$\frac{1+\ell_r a_m}{1+\ell_r a_b}$ . Consequently, if  $a_b \geq a_m$ ,  $\pi_{mT}(q_T^*) \leq \pi_{mP}(q_P^*)$ .

*Third:*  $\pi_{bP} \geq \pi_{bT}$  if  $a_b \geq a_m$ .

Similarly, the buyer's profit can be rewritten as

$$\begin{cases} \pi_{bT}(q_T^*) = p\mathbb{E}[D \wedge q_T^*] - p\bar{F}(q_T^*)q_T^*, \\ \pi_{bP}(q_P^*) = p\mathbb{E}[D \wedge q_P^*] - p\bar{F}(q_P^*)q_P^*. \end{cases} \quad (7)$$

We can show  $\frac{d\pi_{bi}(q_{ii}^*)}{dq_{ii}^*} = p\bar{F}(q_{ii}^*)H(q_{ii}^*) \geq 0$ . Therefore,  $\pi_{bT}(q_T^*) \leq \pi_{bP}(q_P^*)$  given  $q_T^* \leq q_P^*$  if  $a_b \geq a_m$ .

Based on the above analysis, we can infer that  $q_{iT}^* = q_{iP}^*$  if  $a_b = a_m$  regardless of the value of  $a_l$ . Thus, all firms are indifferent of  $P$  and  $T$  if  $a_b = a_m$ . For tie-breaking, our analysis assumes  $P$  is taken when firms are indifferent of both cases.

**Part (ii):**

If  $\ell_g > \ell_s$ , we have  $\eta_l < 1$ . Furthermore, when  $a_l > a_m$ ,  $\eta_m \eta_l$  decreases in  $\ell_g$ . As we show in Part (i),  $\ell_g = \ell_s$ ,  $\eta_m \eta_b < 1$  if  $a_b \geq a_m$ . Then, we can show that if  $a_m \leq a_l, a_b$ ,  $\eta_m \eta_l \eta_b < 1$ , we have  $q_P^* > q_T^*$ . In Eq. (5) and (6), if  $a_b \geq a_m$  and  $q_P^* > q_T^*$ , we have  $\pi_{lP}(q_P^*) > \pi_{lT}(q_T^*)$  and  $\pi_{mP}(q_P^*) > \pi_{mT}(q_T^*)$ . In Eq. (7), if  $q_P^* > q_T^*$ , we have  $\pi_{bP}(q_P^*) > \pi_{bT}(q_T^*)$ . As a result, the proof of Part (ii) is well done.

**Part (iii):**

Since  $a_m > a_l$ , we have  $\eta_m \eta_l$  increases in  $\ell_g$ . If  $\ell_g < \ell_s$ , we have  $\eta_m \eta_l < 1$ . And we already have  $\eta_b < 1$ . Then, we obtain  $\eta_m \eta_l \eta_b < 1$ .

According to Eq. (4), we have  $q_T^*$  and  $q_P^*$ , further  $q_P^*$  decreases in  $\eta_l$ . If  $\ell_g < \ell_s$ , we obtain  $\eta_l$  increases in  $a_l$ . Let  $\hat{a}_l$  solve  $q_T^*(a_l) = q_P^*(a_l)$ . Then, we have  $q_P^* \geq q_T^*$  if  $a_l \leq \hat{a}_l$ .

Similar to the proof in Part (ii), we can show that all firms prefer  $P$  to  $T$  if  $a_b > a_m > a_l$  and even  $a_b \geq \hat{a}_b(\ell_g)$ . Q.E.D.

**Proof of Lemma 5:** Solving Eq. (3), we have  $w_{lT} = \frac{p\bar{F}(q) - w_{mT}(1 + \ell_o a_b)}{1 + \ell_r a_b}$ , and  $w_{lP} = \frac{p\bar{F}(q) - w_{mP}(1 + \ell_r a_b)}{1 + \ell_r a_b}$ .

Submitting  $w_{lT}$  and  $w_{lP}$  into Eq. (5), we have  $w_{mT} = \frac{p\bar{F}(q)[1 - H(q)] - c_l(1 + \ell_r a_b)}{1 + \ell_o a_b}$  and

$$w_{mP} = \frac{p\bar{F}(q)[1 - H(q)](1 + \ell_r a_l)}{(1 + \ell_r a_b)[1 + (\ell_o - \ell_g)a_l]} - c_l \frac{1 + \ell_r a_l}{1 + (\ell_o - \ell_g)a_l}.$$

Submitting  $w_{mT}$  and  $w_{mP}$  into Eq. (4), we can solve  $q_{mT}^*$  and  $q_{mP}^*$  as described in Lemma 5. Q.E.D.

**Proof of Proposition 6: Part (i):** From Lemma 5, we know  $q_{mT}^*$  (i.e.,  $q_T^*$ ) and  $q_{mP}^*$  (i.e.,  $q_P^*$ ) solving the following equations, respectively,

$$\begin{cases} G(p, q_T^*, 1) - c_l(1 + \ell_r a_b) - c_m(1 + \ell_o a_b) = 0 \\ G(p, q_P^*, 1) - c_l(1 + \ell_r a_b) - \eta_m \eta_l \eta_b c_m(1 + \ell_o a_b) = 0. \end{cases} \quad (8)$$

As we know,  $G(p, q, 1)$  decreases with  $q$ . Thus, if  $\eta_m \eta_l \eta_b \leq 1$ , we immediately have  $q_P^* \geq q_T^*$ .

**Part (ii):** We first prove that  $\pi_{bT}(q_T^*) \leq \pi_{bP}(q_P^*)$ ,  $\pi_{lT}(q_T^*) \leq \pi_{lP}(q_P^*)$ , and  $\pi_{mT}(q_T^*) \leq \pi_{mP}(q_P^*)$ , when  $q_T^* \leq q_P^*$ . Similar to the proof of Lemma 5, we submit  $w_{lT}(q_T^*)$ ,  $w_{mT}(q_T^*)$ ,  $w_{lP}(q_P^*)$ , and  $w_{mP}(q_P^*)$  into all firms' profit functions. And we obtain  $\pi_{bT}(q_T^*) = p\mathbb{E}[D \wedge q_T^*] - p\bar{F}(q_T^*)q_T^*$  and  $\pi_{bP}(q_P^*) = p\mathbb{E}[D \wedge q_P^*] - p\bar{F}(q_P^*)q_P^*$ ;  $\pi_{lT}(q_T^*) = p\frac{1 + \ell_r a_l}{1 + \ell_r a_b} \bar{F}(q_T^*)H(q_T^*)q_T^*$  and  $\pi_{lP}(q_P^*) = p\frac{1 + \ell_r a_l}{1 + \ell_r a_b} \bar{F}(q_P^*)H(q_P^*)q_P^*$ ;  $\pi_{mT}(q_T^*) = \frac{1 + \ell_o a_m}{1 + \ell_o a_b} [p\bar{F}(q_T^*)(1 - H(q_T^*)) - c_l(1 + \ell_r a_b)] - c_m(1 + \ell_o a_m)q_T^*$  and

$$\pi_{mP}(q_P^*) = \frac{1 + \ell_r a_l}{1 + \ell_r a_b} \frac{1 + (\ell_o - \ell_g)a_m}{1 + (\ell_o - \ell_g)a_l} [p\bar{F}(q_P^*)(1 - H(q_P^*)) - c_l(1 + \ell_r a_b)] - c_m q_P^*(1 + \ell_o a_m).$$

We can show that  $\frac{d\pi_{bi}(q)}{dq} > 0$  and  $\frac{d\pi_{li}(q)}{dq} > 0$ . Therefore,  $\pi_{bT}(q_{mT}^*) \leq \pi_{bP}(q_{mP}^*)$  and  $\pi_{lT}(q_{mT}^*) \leq \pi_{lP}(q_{mP}^*)$  when  $q_{mT}^* \leq q_{mP}^*$ .

Consider the manufacturer. The inequality of  $1 + \ell_o a_b \geq \frac{(1 + \ell_o a_m)(1 + \ell_r a_b)[1 + (\ell_o - \ell_g)a_l]}{(1 + \ell_r a_l)[1 + (\ell_o - \ell_g)a_m]}$  (i.e.,  $\eta_m \eta_l \eta_b \leq 1$ ) is equivalent to  $\frac{1 + \ell_o a_m}{1 + \ell_o a_b} \leq \frac{1 + \ell_r a_l}{1 + \ell_r a_b} \frac{1 + (\ell_o - \ell_g)a_m}{1 + (\ell_o - \ell_g)a_l}$ . Therefore, for any given  $q$ , we have  $\pi_{mP}(q) \geq \pi_{mT}(q)$ . Let  $q = q_T^*$ , we obtain  $\pi_{mP}(q_T^*) \geq \pi_{mT}(q_T^*)$ . Given  $\eta_m \eta_l \eta_b \leq 1$ , we also have  $q_P^* \geq q_T^*$ . Since  $q_P^*$  is the optimal solution for the manufacturer in  $P$ , we must have

$\pi_{mP}(q_P^*) \geq \pi_{mP}(q_T^*)$ . Therefore, the manufacturer is better off as long as  $\eta_m \eta_l \eta_b \leq 1$ , because  $\pi_{mP}(q_P^*) \geq \pi_{mP}(q_T^*) \geq \pi_{mT}(q_T^*)$ .

If  $\eta_b \geq \frac{a_m}{a_l} \delta$  and  $a_l \geq a_b$ , we can rewrite  $\eta_m \eta_l \eta_b \leq 1$  as  $\ell_g \geq \frac{(1+\ell_o a_m)(a_l - a_b)(\ell_o - \ell_r)}{(1+\ell_o a_m)(a_l - a_b) + (1+\ell_r a_l)(a_b - a_m)} = \frac{1}{1+\beta} \ell_s = \xi \ell_s$ . Therefore, all firms prefer  $P$  to  $T$ , as long as  $\ell_g \in [\xi \ell_s, \ell_o]$ . Here, without loss of generality, we assume  $P$  is preferred if there is a tie between  $P$  and  $T$ .

Otherwise if  $\eta_b < \frac{a_m}{a_l} \delta$  and  $a_l < a_b$ , we can rewrite  $\eta_m \eta_l \eta_b \leq 1$  as  $\ell_g \leq \frac{(1+\ell_o a_m)(a_b - a_l)(\ell_o - \ell_r)}{(1+\ell_o a_m)(a_b - a_l) + (1+\ell_r a_l)(a_m - a_l)} = \frac{1}{1+\beta} \ell_s = \xi \ell_s$ .  $\ell_g \leq \xi \ell_s$ . That is, all firms prefer  $P$  to  $T$ , as long as  $\ell_g \in [0, \xi \ell_s]$ . Q.E.D.

**Proof of Corollary 2:** Corollary 2 is a special case of Proposition 6 and can be obtained immediately by plugging the corresponding conditions. Thus, due to limited space, the proof is omitted. Q.E.D.

**Proof of Proposition 7:** The proof can be obtained from comparing Eq. (4) with Eq. (8), then thus omitted because of limited space. Q.E.D.

**Proof of Proposition 8:** Part (1): When the buyer borrows capital from the bank, we have

$$\pi_{bi}(q_{bi}) = \begin{cases} p\mathbb{E}[D \wedge q_{bi}] - [w_{mi}(1 + \ell_o a_b) + w_{li}(1 + \ell_r a_b)]q_{bi}(1 + r_f), & \text{if } i = T, \\ p\mathbb{E}[D \wedge q_{bi}] - [(w_{mi} + w_{li})(1 + \ell_r a_b)]q_{bi}(1 + r_f), & \text{if } i = P. \end{cases} \quad (9)$$

Taking derivative of  $q_{bi}$  in Eq. (9), we have  $w_{mT} = \frac{p\bar{F}(q) - w_{lT}(1 + \ell_r a_b)(1 + r_f)}{(1 + \ell_o a_b)(1 + r_f)}$  and  $w_{mP} = \frac{p\bar{F}(q) - w_{lP}(1 + \ell_r a_b)(1 + r_f)}{(1 + \ell_r a_b)(1 + r_f)}$ .

Submitting  $w_{mT}$  and  $w_{mP}$  into manufacturer's profit function, and taking derivative of  $q_{mi}$ , we

have  $w_{lT} = \frac{\frac{p}{1+r_f} \bar{F}(q)[1-H(q)] - c_m(1+\ell_o a_m)}{1+\ell_r a_b}$ ,  $w_{lP} = \frac{\frac{p}{1+r_f} \frac{1+(\ell_o - \ell_g)a_m}{1+\ell_r a_b} \bar{F}(q)[1-H(q)] - c_m(1+\ell_o a_m)}{1+(\ell_o - \ell_g)a_m}$ , and  $w_{mP} =$

$\frac{p\bar{F}(q)H(q)}{(1+r_f)(1+\ell_r a_b)} + \frac{c_m(1+\ell_o a_m)}{1+(\ell_o - \ell_g)a_m}$ . Let  $a_i = a$ , where  $i = b, m, l$ . Then, we submit  $w_{lT}$ ,  $w_{lP}$  and  $w_{mP}$  into

3PL's profit function, and rewrite it as the following.  $\pi_{lT} = \frac{p}{1+r_f} \bar{F}(q_{lT})[1 - H(q_{lT})]q_{lT} - c_m(1 +$

$\ell_o a)q_{lT} - c_l(1 + \ell_r a)q_{lT}$ , and  $\pi_{lP} = \frac{p}{1+r_f} \bar{F}(q_{lP})[1 - \frac{1+(\ell_o - \ell_g)a}{1+\ell_r a} H(q_{lP})]q_{lP} - c_m(1 + \ell_o a)q_{lP} - c_l(1 +$

$\ell_r a)q_{lP}$ . Solving  $\frac{d\pi_{lT}}{dq_{lT}} = 0$  and  $\frac{d\pi_{lP}}{dq_{lP}} = 0$  results in Proposition 8.

Part (2): For any given  $r_f$ ,  $q_i^*$  solves the following equations:

$$\begin{cases} G(\frac{p}{1+r_f}, q_i^*, 1) = c_m(1 + \ell_o a) + c_l(1 + \ell_r a), & \text{if } i = T, \\ G(\frac{p}{1+r_f}, q_i^*, \eta_l) = c_m(1 + \ell_o a) + c_l(1 + \ell_r a), & \text{if } i = P. \end{cases}$$

The RHS in the above equations is fixed for any given  $\ell_s$  and  $\ell_g$ . The LHSs decrease with  $q_i^*$ . If  $r_f$  increases,  $\frac{p}{1+r_f}$  decreases. To keep the equations hold, both  $G(\frac{p}{1+r_f}, q_i^*, 1)$  and  $G(\frac{p}{1+r_f}, q_i^*, \eta_l)$  must increase. Consequently  $q_T^*$  and  $q_P^*$  must decrease with  $r_f$ .

Next, we prove that  $\frac{d\pi_{li}(q_i^*)}{dr_f} < 0$ ,  $\frac{d\pi_{mi}(q_i^*)}{dr_f} < 0$ , and  $\frac{d\pi_{bi}(q_i^*)}{dr_f} < 0$ . The buyer's profit is  $\pi_{bi}(q_i^*) = p[\mathbb{E}[D \wedge q_i^*] - \bar{F}(q_i^*)q_i^*]$ . Since  $\frac{d\pi_{bi}(q_i^*)}{dq_i^*} > 0$  and  $\frac{dq_i^*}{dr_f} < 0$ , we have  $\frac{d\pi_{bi}(q_i^*)}{dr_f} < 0$ . The manufacturer's profit functions are  $\pi_{mT}(q_T^*) = \frac{p}{1+r_f} q_T^* \bar{F}(q_T^*) H(q_T^*)$  and  $\pi_{mP}(q_P^*) = \frac{p}{1+r_f} \eta_l q_P^* \bar{F}(q_P^*) H(q_P^*)$ , in  $T$  and  $P$ , respectively. We have  $q\bar{F}(q)H(q)$  increases with  $q$ , and then  $q_i^* \bar{F}(q_i^*) H(q_i^*)$  decreases with  $r_f$ , because  $\frac{dq_i^*}{dr_f} < 0$ . Because  $\frac{p}{1+r_f}$  decreases with  $r_f$ , both  $\pi_{mT}(q_T^*)$  and  $\pi_{mP}(q_P^*)$  decrease with  $r_f$ . For the 3PL, we have  $\frac{d\pi_{li}(q_i^*)}{dr_f} = \frac{\partial \pi_{li}(q_i^*)}{\partial q_i^*} \frac{dq_i^*}{dr_f} + \frac{\partial \pi_{li}(q_i^*)}{\partial r_f} = \frac{\partial \pi_{li}(q_i^*)}{\partial r_f}$ . We then obtain  $\frac{d\pi_{lT}(q_T^*)}{dr_f} = -\frac{p}{(1+r_f)^2} \bar{F}(q_T^*) [1 - H(q_T^*)] q_T^* < 0$  and  $\frac{d\pi_{lP}(q_P^*)}{dr_f} = -\frac{p}{(1+r_f)^2} \bar{F}(q_P^*) [1 - \frac{1+(\ell_o - \ell_g)a}{1+\ell_r a} H(q_P^*)] q_P^* < 0$ . Q.E.D.

**Proof of Proposition 9: Part (i):** Similar to the proof in Lemma 3, the first order conditions of Eq. (19) in  $T$  and  $P$ , respectively, give us

$$\frac{p}{n} \bar{F}(q_{lT}) [(1 - H(q_{lT}))(n - H(q_{lT})) - q_{lT} H'(q_{lT})] = c'_l + c'_m, \quad (10)$$

$$\frac{p}{n} \bar{F}(q_{lP}) [(1 - \eta_l H(q_{lP}))(n - H(q_{lP})) - \eta_l q_{lP} H'(q_{lP})] = c'_l + c'_m. \quad (11)$$

For a fixed  $q_{lT}$ , as  $n$  increases,  $(p - \frac{p}{n} H(q_{lT}))$  and  $-\frac{p}{n} q_{lT} H'(q_{lT})$  increases, and then  $\bar{F}(q_{lT}) [(1 -$

$H(q_{IT})(p - \frac{p}{n}H(q_{IT})) - \frac{p}{n}q_{IT}H'(q_{IT})]$  increases. Given that the right hand sides are constant, as  $n$  increases,  $q_{li}$  must increase to satisfy the first equation. The same logic applies to the second equation. Then, we can show that  $\frac{\partial q_T^*}{\partial n} > 0$  and  $\frac{\partial q_P^*}{\partial n} > 0$ .

The proof is similar to that of Proposition 1. Given any  $n$ , the firms' preference is independent of  $n$  but hinges on the values of  $\ell_g$  and  $\ell_s$ . We have  $q_{IP}^* \geq q_{IT}^*$  iff  $\ell_g \geq \ell_s$ ; otherwise  $q_{IP}^* < q_{IT}^*$ .

**Part (ii):** We use the contradiction approach to prove this. Assume that  $\frac{\partial q_P^*}{\partial n} \leq \frac{\partial q_T^*}{\partial n}$  if  $\ell_g \geq \ell_s$ . Let  $G1(n) = \frac{p}{n}\bar{F}(q_{IT})[(1 - H(q_{IT}))(n - H(q_{IT})) - q_{IT}H'(q_{IT})]$  in Eq. (10), and  $G2(n) = \frac{p}{n}\bar{F}(q_{IP})[(1 - \eta_l H(q_{IP}))(n - H(q_{IP})) - \eta_l q_{IP}H'(q_{IP})]$  in Eq. (11). And  $G1(n)$  and  $G2(n)$  increase in  $n$ . Since  $\frac{\partial q_P^*}{\partial n} \leq \frac{\partial q_T^*}{\partial n}$ , we should find an  $n$  equal to  $\tilde{n}$  satisfying  $q_T^*(\tilde{n}) > q_P^*(\tilde{n})$ . If  $\ell_g \geq \ell_s$ , we have  $\eta_l \leq 1$ . Then for any given  $n$ , we have  $G1(n) \leq G2(n)$ . Consequently, from Eq. (10) and (11), we have  $q_T^* \leq q_P^*$ , which contradicts the previous result. Therefore, we have  $\frac{\partial q_P^*}{\partial n} \geq \frac{\partial q_T^*}{\partial n}$ . Q.E.D.

**Proof of Proposition 10:** For limited space, we focus only on the 3PL leadership game. The result is the same for manufacturer leadership. According to Lemma 3, the following FOC conditions must hold.

$$\begin{cases} G(p, q_T^*, 1) = c_m(1 + \ell_o a) + c_l(1 + \ell_r a), \\ G(p, q_P^*, \eta_l) = c_m(1 + \ell_o a) + c_l(1 + \ell_r a). \end{cases}$$

As proved in Lemma 3, for any given  $\ell_g$ , LHS decreases with  $q$  in the above equations. Note that  $\ell_o = L_{si} + \ell_r$ . When  $L_{si}$  increases, RHS increases in both Models  $T$  and  $P$ . To keep the equations hold, LHS must increase and, therefore,  $q_i^*$  must decrease with  $L_{si}$ . Meanwhile, for the buyer, its profit is  $\pi_{bi}(q_i^*) = p[\mathbb{E}[D \wedge q_i^*] - q_i^* \bar{F}(q_i^*)]$ . It can be proved that  $\frac{d\pi_{bi}(q_i^*)}{dq_i^*} > 0$ . Since  $\frac{dq_i^*}{dL_{si}} < 0$ , we have  $\frac{d\pi_{bi}(q_i^*)}{dL_{si}} < 0$ . For the 3PL, its profit in Model  $T$  is  $\pi_{IT}(q_T) = p\bar{F}(q_T)[1 - H(q_T)]q_T - c_m(1 + \ell_o a)q_T - c_l(1 + \ell_r)q_T$ .  $\frac{d\pi_{IT}(q_T^*)}{dL_{sT}} = \frac{\partial \pi_{IT}(q_T^*)}{\partial q_T^*} \frac{dq_T^*}{dL_{sT}} + \frac{\partial \pi_{IT}(q_T^*)}{\partial L_{sT}}$ . From Lemma 3, we have  $\frac{\partial \pi_{IT}(q_T^*)}{\partial q_T^*} = 0$ , and  $\frac{d\pi_{IT}(q_T^*)}{dL_{sT}} = \frac{\partial \pi_{IT}(q_T^*)}{\partial L_{sT}} = -c_m q_T^* a < 0$ . The 3PL's profit in Model  $P$  is  $\pi_{IP}(q_P) = p\bar{F}(q_P)[1 - \eta_l H(q_P)]q_P - c_m(1 + \ell_o a)q_P - c_l(1 + \ell_r)q_P$ . Similarly, we have  $\frac{d\pi_{IP}(q_P^*)}{dL_{sP}} = -\frac{p a}{1 + \ell_r a} q_P^* \bar{F}(q_P^*) H(q_P^*) - c_m q_P^* a < 0$ .

Because both  $\Pi_{bi}$  and  $\Pi_{li}$ ,  $i = T, P$ , decrease with  $L_{si}$ , the Nash bargaining product for any given  $\theta_b \in [0, 1]$  decreases with  $L_{si}$ . Therefore, the optimal Nash bargaining solution is achieved at the lower bound  $L_{si}^* = \ell_s$ ,  $i = T, P$ . Q.E.D.

**Proof of Proposition 11:** The proof is provided conceptually right after the proposition. Q.E.D.

**Proof of Corollary 3:** Let  $\tilde{\ell} = \frac{(1 + \ell_o a_m a_b)(\ell_o - \ell_r)}{a_m(1 + \ell_o a_b)}$  and  $\check{\ell}$  solve  $\pi_{IT}(q_T^*) = \pi_{IP}(q_P^*, \ell_g)$ . If  $\ell_g \leq \tilde{\ell}$ , we have  $\frac{1 + (\ell_o - \ell_g)a_m}{1 + \ell_r a_b} \geq \frac{1 + \ell_o a_m}{1 + \ell_o a_m}$ . From Lemma 2, we obtain  $q_P^* \geq q_T^*$ . To prove  $T \prec P$ , we need to prove  $\pi_{bT}(q_T^*) \leq \pi_{bP}(q_P^*)$ ,  $\pi_{mT}(q_T^*) \leq \pi_{mP}(q_P^*)$ , and  $\pi_{IT}(q_T^*) \leq \pi_{IP}(q_P^*)$ . Submitting  $q_T^*$  and  $q_P^*$  into buyer's profit function, we have  $\pi_{bT}(q_T^*) = p \min[D \wedge q_T^*] - p\bar{F}(q_T^*)q_T^*$  and  $\pi_{bP}(q_P^*) = p \min[D \wedge q_P^*] - p\bar{F}(q_P^*)q_P^*$ . Then we have  $\pi_{bT}(q_T^*) \leq \pi_{bP}(q_P^*)$  if  $q_T^* \leq q_P^*$  or  $\ell_g \leq \tilde{\ell}$ . Similarly,  $\pi_{mT}(q_T^*) \leq \pi_{mP}(q_P^*)$  when  $\ell_g \leq \tilde{\ell}$ .

Since  $\frac{d\pi_{IP}(q_P^*)}{d\ell_g} = \frac{\partial \pi_{IP}(q_P^*)}{\partial q_P^*} \frac{dq_P^*}{d\ell_g} + \frac{\partial \pi_{IP}(q_P^*)}{\partial \ell_g}$ , we have  $\frac{d\pi_{IP}(q_P^*)}{d\ell_g} = \{(\frac{p\bar{F}(q_P^*)}{1 + \ell_r a_l} - w_l)q_P^* + [(w_l - c_l)\ell_r + \frac{c_m(1 + \ell_o a_m)(\ell_g - \ell_s)}{1 + (\ell_o - \ell_g)a_m}]q_P^*\} a_l + (w_l - c_l)q_P^*$ , where  $q_P^* = \frac{dq_P^*}{d\ell_g} < 0$ . Let  $A(\ell_g) = (\frac{p\bar{F}(q_P^*)}{1 + \ell_r a_l} - w_l)q_P^* + [(w_l - c_l)\ell_r + \frac{c_m(1 + \ell_o a_m)(\ell_g - \ell_s)}{1 + (\ell_o - \ell_g)a_m}]q_P^*$ , we get  $\frac{d\pi_{IP}(q_P^*)}{d\ell_g} = A(\ell_g)a_l + (w_l - c_l)q_P^*$ , then  $\frac{d\pi_{IP}(q_P^*)}{d\ell_g}$  is a linear function of  $a_l$ . If  $a_l < \frac{(c_l - w_l)q_P^*}{A(\ell_g)}$ ,  $\pi_{IP}(q_P^*)$  decreases in  $\ell_g$ . Then  $\ell_g \leq [\check{\ell}, \tilde{\ell}]$ ,  $T \prec P$ . Otherwise,  $\pi_{IP}(q_P^*)$  increases in  $\ell_g$ . If  $\check{\ell} < \tilde{\ell}$ , we have  $T \prec P$ . Q.E.D.
